# Supplementary material for: Economic Implications of a Protein Transition: Evidence From Walloon Beef and Dairy Farms
Source: Frontiers journal article supplement (doi:10.3389/fsufs.2022.803872), 2022-04-05
Supplement: Data_Sheet_1.pdf [file Data_Sheet_1.pdf]

## Appendix

Table A1: Summary statistics of dependent variables (per cow or per labour)

|                           |       |                                                                     | Dairy sector |                    |             |            | Beef sector |                    |             |           | Sector comparison |
|---------------------------|-------|---------------------------------------------------------------------|--------------|--------------------|-------------|------------|-------------|--------------------|-------------|-----------|-------------------|
| Number of observations    |       |                                                                     | N = 324      |                    |             |            | N = 208     |                    |             |           | N = 532           |
| Name                      | Units | Description                                                         | Mean         | Standard deviation | Minimum     | Maximum    | Mean        | Standard deviation | Minimum     | Maximum   | Two-sided p-value |
| Gross revenues/cow        | €/cow | Total revenues – subsidies per cow                                  | 5,956.15     | 26,349.71          | -141,322.30 | 88,214.56  | -17,572.33  | 15,713.87          | -66,788.32  | 12,962.46 | p < 0.001         |
| Gross revenues/labour     | €/AWU | Total revenues – subsidies per annual work unit                     | 2,651.04     | 852.45             | 718.47      | 6,099.36   | 1,484.70    | 449.65             | 438.77      | 2,763.46  | p < 0.001         |
| Operating expenses/cow    | €/cow | Operating costs per cow                                             | 1,142.62     | 477.97             | 192.38      | 3,223.52   | 819.12      | 283.69             | 136.96      | 1,483.31  | p = 0.001         |
| Operating expenses/labour | €/AWU | Operating costs per annual work unit                                | 54,293.69    | 33,945.93          | 3,586.74    | 202,124.3  | 38,816.18   | 23,539.32          | 5,488.20    | 108,764.5 | p < 0.001         |
| Operating profits/cow     | €/cow | (Total revenues – subsidies – operating costs) per cow              | 1,480.44     | 588.45             | 22.23       | 3,642.97   | 644.04      | 329.66             | -71.60      | 1791.86   | p < 0.001         |
| Operating profits/labour  | €/AWU | (Total revenues – subsidies – operating costs) per annual work unit | 65,229.06    | 36,380.66          | 864.78      | 250,089.00 | 27,557.52   | 16,161.66          | -2,239.86   | 78,990.06 | p < 0.001         |
| Subsidy/cow               | €/cow | Subsidies per cow                                                   | 391.24       | 203.46             | 111.15      | 1,572.98   | 555.869     | 0.07               | -141,322.30 | 88,214.56 | p < 0.001         |
| Subsidy/labour            | €/AWU | Subsidies per annual work unit                                      | 15,263.08    | 5,981.85           | 3,986.99    | 42,911.96  | 23,299.31   | 11,138.74          | 6,816.77    | 78,900.31 | p < 0.001         |

All variables are expressed per year.

Table A2: Random effects regression analysis for the dairy sector – (dependent variables per cow) (N = 324)

|                              | <b>Milk<br/>productivity</b> | <b>Gross<br/>revenues/cow</b> | <b>Operating<br/>expenses/cow</b> | <b>Operating<br/>profits/cow</b> | <b>Operating<br/>profit margin</b> | <b>Subsidy/cow</b> | <b>Subsidy<br/>dependence</b> |
|------------------------------|------------------------------|-------------------------------|-----------------------------------|----------------------------------|------------------------------------|--------------------|-------------------------------|
| Log (herd size)              | 0.16<br>(0.22)               | 0.07<br>(0.21)                | -0.17<br>(0.246)                  | 0.43<br>(0.31)                   | 11.340.11<br>(8.68)                | -1.47***<br>(0.34) | -27.62***<br>(7.37)           |
| Grazing livestock<br>density | -0.005<br>(0.07)             | -0.04<br>(0.08)               | 0.16*<br>(0.09)                   | -0.22<br>(0.14)                  | -9.71***<br>(3.60)                 | 0.32*<br>(0.17)    | 7.43**<br>(3.04)              |
| Log (cattle area)            | -0.04<br>(0.23)              | 0.01<br>(0.22)                | 0.29<br>(0.27)                    | -0.32<br>(0.35)                  | -12.16<br>(9.08)                   | 1.13***<br>(0.35)  | 22.09***<br>(7.12)            |
| Share of grassland           | -0.004***<br>(0.002)         | -0.003<br>(0.002)             | -0.006**<br>(0.003)               | 0.002<br>(0.003)                 | 0.17**<br>(0.08)                   | 0.001<br>(0.002)   | 0.06<br>(0.03)                |
| Log (total concentrate)      | 0.007<br>(0.004)             | 0.01*<br>(0.007)              | 0.02**<br>(0.01)                  | 0.01<br>(0.009)                  | -0.510<br>(0.404)                  | -0.002<br>(0.007)  | -0.268<br>(0.221)             |
| Concentrate autonomy         | -0.004*<br>(0.002)           | -0.002<br>(0.002)             | -0.005***<br>(0.002)              | 0.002<br>(0.002)                 | 0.12**<br>(0.05)                   | 0.001<br>(0.002)   | 0.05<br>(0.07)                |
| Log (labour)                 | 0.05<br>(0.03)               | 0.04<br>(0.05)                | 0.05<br>(0.06)                    | 0.02<br>(0.12)                   | 1.12<br>(2.87)                     | 0.13*<br>(0.07)    | 2.11*<br>(1.24)               |
| Constant                     | 8.32***<br>(0.28)            | 8.84***<br>(0.38)             | 6.75***<br>(0.53)                 | 6.89***<br>(0.63)                | 63.12***<br>(14.71)                | 7.73<br>(0.38)     | 36.17***<br>(5.57)            |
| R <sup>2</sup> overall       | 0.137                        | 0.273                         | 0.349                             | 0.205                            | 0.316                              | 0.603              | 0.562                         |

\*\*\*, \*\*, \* denote statistical significance at the 1, 5, and 10 percent levels, respectively. Robust standard errors are reported between parentheses.

Milk productivity, gross revenues, operating expenses, operating profits and subsidies are expressed in logarithmic values.

Seven region dummies are included (*Sablo-limoneuse*, *Condroz*, *Herbagère*, *Ardenne*, *Ardenne*, *Jura*, *Famenne*), with *Limoneuse* as base level.

Three year dummies are included for 2015, 2016 and 2017, with 2014 as base level.

Table A3: Random effects regression analysis for the dairy sector – (dependent variables per annual work unit) (N = 324)

|                              | <b>Milk<br/>productivity</b> | <b>Gross<br/>revenues/labour</b> | <b>Operating<br/>expenses/labour</b> | <b>Operating<br/>profits/labour</b> | <b>Operating profit<br/>margin</b> | <b>Subsidy/labour</b> | <b>Subsidy<br/>dependence</b> |
|------------------------------|------------------------------|----------------------------------|--------------------------------------|-------------------------------------|------------------------------------|-----------------------|-------------------------------|
| Log (herd size)              | 0.16<br>(0.22)               | 1.30<br>(0.95)                   | 0.49<br>(0.32)                       | 1.08***<br>(0.35)                   | 11.34<br>(8.68)                    | -0.57*<br>(0.30)      | -27.62***<br>(7.37)           |
| Grazing livestock<br>density | -0.005<br>(0.07)             | -0.28<br>(0.55)                  | 0.29**<br>(0.13)                     | -0.04<br>(0.17)                     | -9.71***<br>(3.60)                 | 0.35**<br>(0.15)      | 7.43**<br>(3.04)              |
| Log (cattle area)            | -0.04<br>(0.23)              | -0.34<br>(0.98)                  | 0.58*<br>(0.31)                      | -0.001<br>(0.39)                    | -12.16<br>(9.08)                   | 1.19***<br>(0.32)     | 22.09***<br>(7.12)            |
| Share of grassland           | -0.004***<br>(0.002)         | 0.007<br>(0.008)                 | -0.006**<br>(0.003)                  | 0.001<br>(0.003)                    | 0.17**<br>(0.08)                   | 0.001<br>(0.002)      | 0.06<br>(0.04)                |
| Log (total concentrate)      | 0.007<br>(0.004)             | 0.04<br>(0.03)                   | 0.02**<br>(0.01)                     | 0.01<br>(0.011)                     | -0.510<br>(0.404)                  | -0.005<br>(0.005)     | -0.268<br>(0.221)             |
| Concentrate autonomy         | -0.004*<br>(0.002)           | -0.001<br>(0.006)                | -0.006***<br>(0.002)                 | 0.001<br>(0.002)                    | 0.12**<br>(0.05)                   | 0.00<br>(0.003)       | 0.05<br>(0.07)                |
| Log (labour)                 | 0.05<br>(0.03)               | -0.70**<br>(0.33)                | -0.84***<br>(0.09)                   | -0.92***<br>(0.11)                  | 1.12<br>(2.87)                     | -0.87***<br>(0.05)    | 2.11*<br>(1.24)               |
| Constant                     | 8.32***<br>(0.28)            | 5.60***<br>(1.34)                | 6.40***<br>(0.56)                    | 6.41***<br>(0.58)                   | 0.63***<br>(0.15)                  | 7.41***<br>(0.35)     | 0.36***<br>(0.06)             |
| R <sup>2</sup> overall       | 0.137                        | 0.284                            | 0.690                                | 0.516                               | 0.316                              | 0.600                 | 0.562                         |

\*\*\*, \*\*, \* denote statistical significance at the 1, 5, and 10 percent levels, respectively. Robust standard errors are reported between parentheses.

Milk productivity, gross revenues, operating expenses, operating profits and subsidies are expressed in logarithmic values.

Seven region dummies are included (*Sablo-limoneuse*, *Condroz*, *Herbagère*, *Ardenne*, *Jura*, *Famenne*), with *Limoneuse* as base level.

Three year dummies are included for 2015, 2016 and 2017, with 2014 as base level.

Table A4: Random effects regression analysis for the beef sector – (dependent variables per cow) (N = 208)

|                              | Gross<br>revenues/cow | Operating<br>expenses/cow | Operating<br>profits/cow | Operating profit<br>margin | Subsidy/cow          | Subsidy<br>dependence |
|------------------------------|-----------------------|---------------------------|--------------------------|----------------------------|----------------------|-----------------------|
| Log (herd size)              | 0.17<br>(0.29)        | -0.19<br>(0.27)           | 0.34<br>(0.86)           | 4.52<br>(16.31)            | -1.10***<br>(0.23)   | -30.75***<br>(4.93)   |
| Grazing livestock<br>density | 0.01<br>(0.14)        | 0.12<br>(0.12)            | 0.08<br>(0.41)           | 0.054<br>(7.740)           | 0.24**<br>(0.12)     | 6.69***<br>(2.26)     |
| Log (cattle area)            | -0.11<br>(0.30)       | 0.20<br>(0.27)            | -0.21<br>(0.82)          | -1.15<br>(16.12)           | 1.04***<br>(0.24)    | 28.31***<br>(5.60)    |
| Share of grassland           | -0.005*<br>(0.003)    | -0.010***<br>(0.002)      | 0.007<br>(0.009)         | 0.32<br>(0.19)             | 0.001<br>(0.003)     | 0.12*<br>(0.07)       |
| Log (total concentrate)      | 0.02<br>(0.01)        | 0.04*<br>(0.02)           | -0.02<br>(0.02)          | -1.56***<br>(0.28)         | -0.006<br>(0.006)    | -0.535<br>(0.439)     |
| Concentrate autonomy         | -0.002<br>(0.001)     | -0.003**<br>(0.001)       | 0.00<br>(0.003)          | 0.09*<br>(0.05)            | -0.003***<br>(0.001) | -0.04<br>(0.03)       |
| Log (labour)                 | 0.09<br>(0.10)        | 0.18*<br>(0.11)           | 0.06<br>(0.24)           | -2.13<br>(4.75)            | 0.07<br>(0.07)       | -0.63<br>(2.27)       |
| Constant                     | 7.39***<br>(0.44)     | 7.00***<br>(0.50)         | 5.47***<br>(1.26)        | 24.80<br>(28.67)           | 6.76***<br>(0.47)    | 36.72***<br>(12.84)   |
| R <sup>2</sup> overall       | 0.338                 | 0.500                     | 0.191                    | 0.309                      | 0.661                | 0.679                 |

\*\*\*, \*\*, \* denote statistical significance at the 1, 5, and 10 percent levels, respectively. Robust standard errors are reported between parentheses.

Gross revenues, operating expenses, operating profits and subsidies are expressed in logarithmic values.

Seven region dummies are included (*Sablo-limoneuse*, *Condroz*, *Herbagère*, *Ardenne*, *Ardenne*, *Jura*, *Famenne*), with *Limoneuse* as base level.

Three year dummies are included for 2015, 2016 and 2017, with 2014 as base level.

Table A5: Random effects regression analysis for the beef sector – (dependent variables per annual work unit) (N = 208)

|                              | Gross<br>revenues/labour | Operating<br>expenses/labour | Operating<br>profits/labour | Operating profit<br>margin | Subsidy/labour      | Subsidy<br>dependence |
|------------------------------|--------------------------|------------------------------|-----------------------------|----------------------------|---------------------|-----------------------|
| Log (herd size)              | -5.88<br>(6.24)          | 0.43*<br>(0.23)              | 1.01<br>(0.89)              | 4.52<br>(16.31)            | -0.26<br>(0.22)     | -30.75***<br>(4.93)   |
| Grazing livestock<br>density | 4.91<br>(3.60)           | 0.31***<br>(0.11)            | 0.27<br>(0.42)              | 0.054<br>(7.54)            | 0.36***<br>(0.105)  | 6.70***<br>(2.26)     |
| Log (cattle area)            | 6.56<br>(7.80)           | 0.55**<br>(0.24)             | 0.11<br>(0.86)              | -1.15<br>(16.12)           | 1.12***<br>(0.22)   | 28.31***<br>(5.60)    |
| Share of grassland           | 0.18**<br>(0.08)         | -0.008***<br>(0.003)         | 0.009<br>(0.009)            | 0.32<br>(0.195)            | 0.003<br>(0.002)    | 0.12*<br>(0.07)       |
| Log (total concentrate)      | -1.24<br>(1.04)          | 0.04**<br>(0.02)             | -0.02<br>(0.015)            | -1.56***<br>(0.28)         | -0.004<br>(0.009)   | -0.53<br>(0.44)       |
| Concentrate autonomy         | 0.015<br>(0.021)         | -0.002***<br>(0.001)         | 0.001<br>(0.003)            | 0.09*<br>(0.05)            | -0.002**<br>(0.001) | -0.04<br>(0.03)       |
| Log (labour)                 | 3.81<br>(3.91)           | -0.80***<br>(0.10)           | -0.96***<br>(0.26)          | -2.13<br>(4.75)            | -0.89***<br>(0.06)  | -0.63<br>(2.27)       |
| Constant                     | -7.05<br>(12.14)         | 6.01***<br>(0.52)            | 4.305***<br>(1.315)         | 24.89<br>(28.67)           | 5.825***<br>(0.435) | 36.71***<br>(12.84)   |
| R <sup>2</sup> overall       | 0.637                    | 0.818                        | 0.427                       | 0.309                      | 0.778               | 0.679                 |

\*\*\*, \*\*, \* denote statistical significance at the 1, 5, and 10 percent levels, respectively. Robust standard errors are reported between parentheses. Gross revenues, operating expenses, operating profits and subsidies are expressed in logarithmic values. Seven region dummies are included (*Sablo-limoneuse*, *Condroz*, *Herbagère*, *Ardenne*, *Ardenne*, *Jura*, *Famenne*), with *Limoneuse* as base level. Three year dummies are included for 2015, 2016 and 2017, with 2014 as base level.
